# Supplementary material for: Active Compounds and Targets of Yuanzhi Powder in Treating Alzheimer's Disease and Its Relationship with Immune Infiltration Based on HPLC Fingerprint and Network Pharmacology
Source: Evid Based Complement Alternat Med. 2022 Jul 15;2022:3389180. doi: 10.1155/2022/3389180 (PMC9307349; doi:10.1155/2022/3389180)
Supplement: Supplementary Materials — Supplementary Table 1: Active compounds of Yuanzhi powder. Supplementary Table 2: The differential genes of Alzheimer's disease. [file 3389180.f1.zip]

Archive with 2 entries (2 files):
- 3389180.f1/Supplementary Table 1.docx
- 3389180.f1/Supplementary Table 2.docx
